# Supplementary material for: Cation Exchange of Natural Zeolites: Worldwide Research
Source: MDPI journal article supplement (doi:10.3390/su13147751), 2021-07-12
Supplement: s1 [file s1]

## Supplementary Materials

Article

# Cation Exchange of Natural Zeolites: Worldwide Research

**Table S1.** Top 15 of the most cited documents.

| Rank | Authors                                              | Year | Title of documents                                                                                                          | TC   | References |
|------|------------------------------------------------------|------|-----------------------------------------------------------------------------------------------------------------------------|------|------------|
| 1    | Wang S. and Peng Y.                                  | 2010 | Natural zeolites as effective adsorbents in water and wastewater treatment                                                  | 1147 | [8]        |
| 2    | Erdem E., Karapinar N. and Donat R.                  | 2004 | The removal of heavy metal cations by natural zeolites                                                                      | 1065 | [5]        |
| 3    | Haggerty G.M. and Bowman R.S.                        | 1994 | Sorption of Chromate and Other Inorganic Anions by Organo-Zeolite                                                           | 407  | [6]        |
| 4    | Bissen M. and Frimmel F.H.                           | 2003 | Arsenic - A review. Part II: Oxidation of arsenic and its removal in water treatment                                        | 400  | [115]      |
| 5    | Perić J., Trgo M. and Vukojević Medvidović N.        | 2004 | Removal of zinc, copper and lead by natural zeolite - A comparison of adsorption isotherms                                  | 395  | [116]      |
| 6    | Vaca M., López R., Gehr R., Jiménez B., Alvarez P.   | 2001 | Heavy metal removal with mexican clinoptilolite: Multi-component ionic exchange                                             | 294  | [7]        |
| 7    | Ćurković L., Cerjan-Stefanović S. and Filipan T.     | 1997 | Metal ion exchange by natural and modified zeolites                                                                         | 287  | [14]       |
| 8    | Saltali K., Sari A. and Aydin M.                     | 2007 | Removal of ammonium ion from aqueous solution by natural Turkish (Yıldızeli) zeolite for environmental quality              | 287  | [111]      |
| 9    | Wang S. and Zhu Z.H.                                 | 2006 | Characterisation and environmental application of an Australian natural zeolite for basic dye removal from aqueous solution | 284  | [45]       |
| 10   | Jorgensen T.C. and Weatherley L.R.                   | 2003 | Ammonia removal from wastewater by ion exchange in the presence of organic contaminants                                     | 275  | [106]      |
| 11   | Matheickal J.T. and Yu Q.                            | 1999 | Biosorption of lead(II) and copper(II) from aqueous solutions by pre-treated biomass of Australian marine algae             | 259  | [108]      |
| 12   | Wingenfelder U., Hansen C., Furrer G. and Schulin R. | 2005 | Removal of heavy metals from mine waters by natural zeolites                                                                | 240  | [117]      |
| 13   | Ouki S.K. and Kavannagh M.                           | 1997 | Performance of natural zeolites for the treatment of mixed metal- contaminated effluents                                    | 234  | [118]      |

- |    |                                                     |      |                                                                                                 |     |      |
|----|-----------------------------------------------------|------|-------------------------------------------------------------------------------------------------|-----|------|
| 14 | Misaelides P.                                       | 2011 | Application of natural zeolites in environmental remediation: A short review                    | 230 | [11] |
| 15 | Kesraoui-Ouki S.,<br>Cheeseman C.R. and<br>Perry R. | 1994 | Natural zeolite utilisation in pollution control: A review of applications to metals' effluents | 224 | [27] |

---

Abbreviations: TC= Total number of citations received for document.
